# Supplementary material for: A highly hydrophilic water-insoluble nanofiber composite as an efficient and easily-handleable adsorbent for the rapid adsorption of cesium from radioactive wastewater
Source: Royal Society of Chemistry journal article supplement (doi:10.1039/c4ra09713k), 2014-01-01
Supplement: c4ra09713k1.pdf [file c4ra09713k1.pdf]

# **Highly hydrophilic water-insoluble nanofiber composite as an efficient and easily-handleable adsorbent for a rapid adsorption of cesium from radioactive wastewater**

Hyunsik Bang,<sup>a</sup> Kei Watanabe,<sup>a</sup> Ryu Nakashima,<sup>a</sup> Wei Kai,<sup>b</sup> Kyung-Hun Song,<sup>c</sup> Jung Soon Lee,<sup>d</sup>  
Mayakrishnan Gopiraman,<sup>a</sup> and Ick-Soo Kim<sup>\*a</sup>

<sup>a</sup>Nano Fusion Technology Research Lab, Division of Frontier Fibers, Institute for Fiber Engineering (IFES), Interdisciplinary Cluster for Cutting Edge Research (ICCER), National University Corporation, Shinshu University, Ueda, Nagano 386 8567, Japan

<sup>b</sup>College of Textile Clothing Engineering, Soochow University, Suzhou, 215021, China

<sup>c</sup>Department of Clothing & Textiles, PaiChai University, Daejeon 302-735, South Korea

<sup>d</sup>Department of Clothing and Textiles, Chungnam National University, Daejeon 305-764, South Korea

<sup>\*</sup>Corresponding author: kim@shinshu-u.ac.jp and kimicksoo.gr@gmail.com (I.S. Kim).

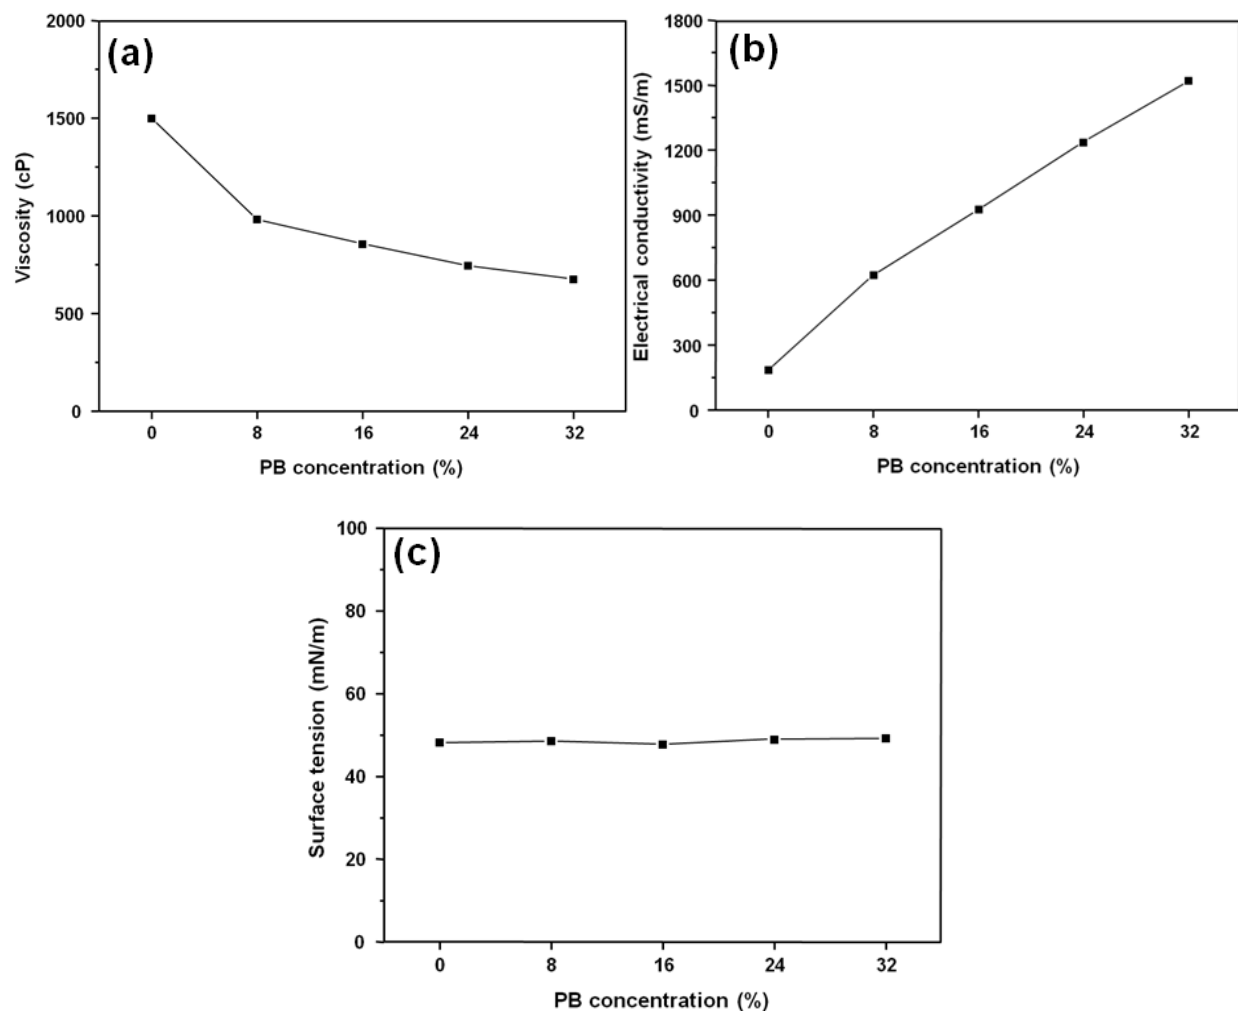

**Figure S1.** (a) Viscosity, (b) electrical conductivity and (c) surface tension of the PVA solution at different concentrations of PBNPs.

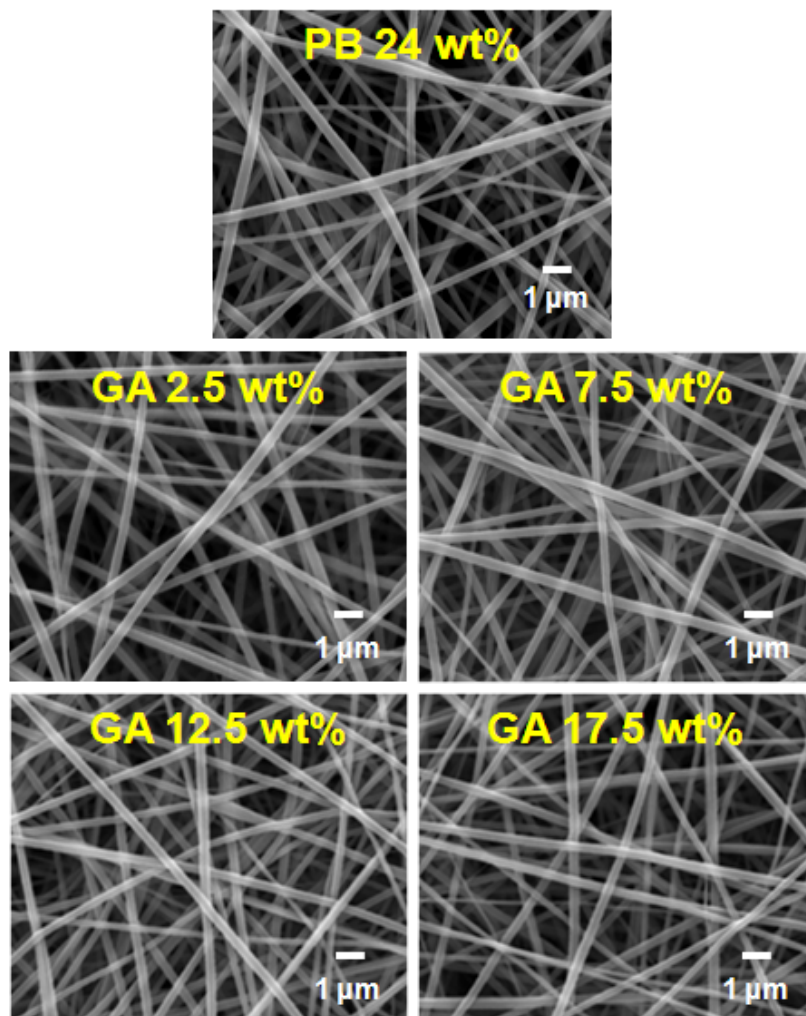

**Figure S2.** SEM images of *c*-PBNPs/PVA composite nanofibers at different concentrations of GA.

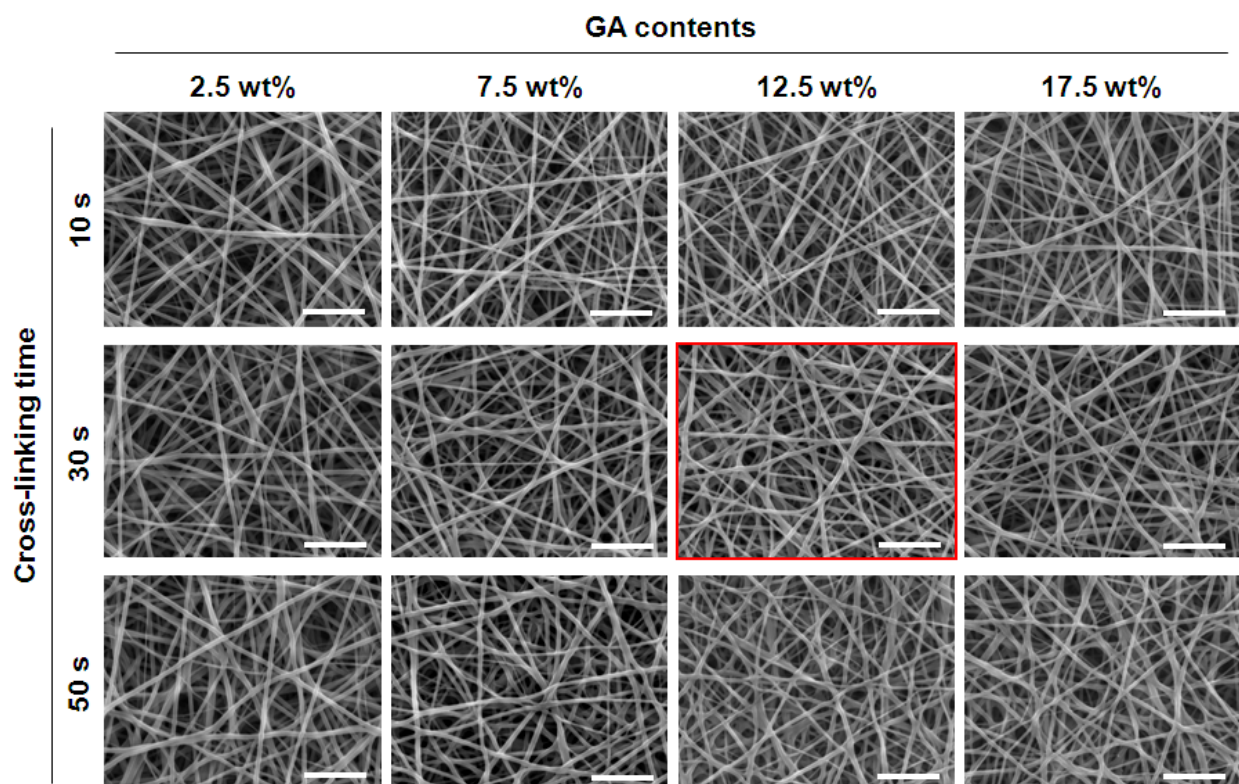

**Figure S3.** SEM images of *c*-PBNPs/PVA composite nanofibers with different concentrations of GA at different exposure times.

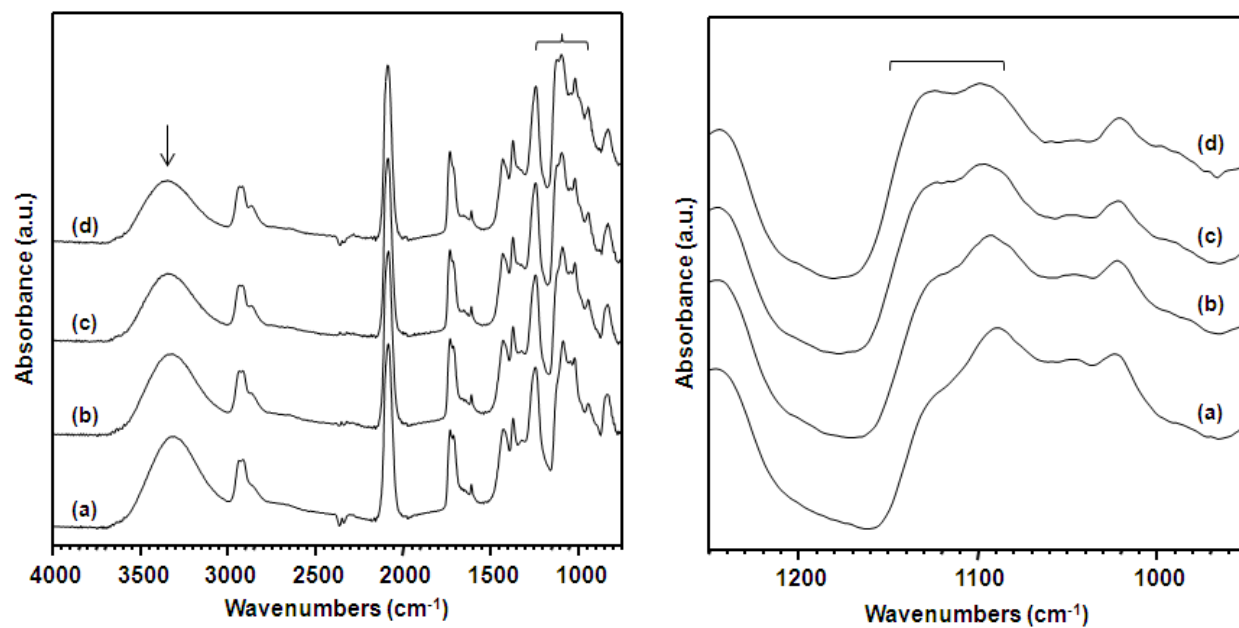

**Figure S4.** FT-IR spectra of *c*-PBNPs/PVA composite nanofibers with different concentrations of GA at the exposure time of 30 s, (a) 2.5 wt%, (b) 7.5 wt%, (c) 12.5 wt% and (d) 17.5 wt%.

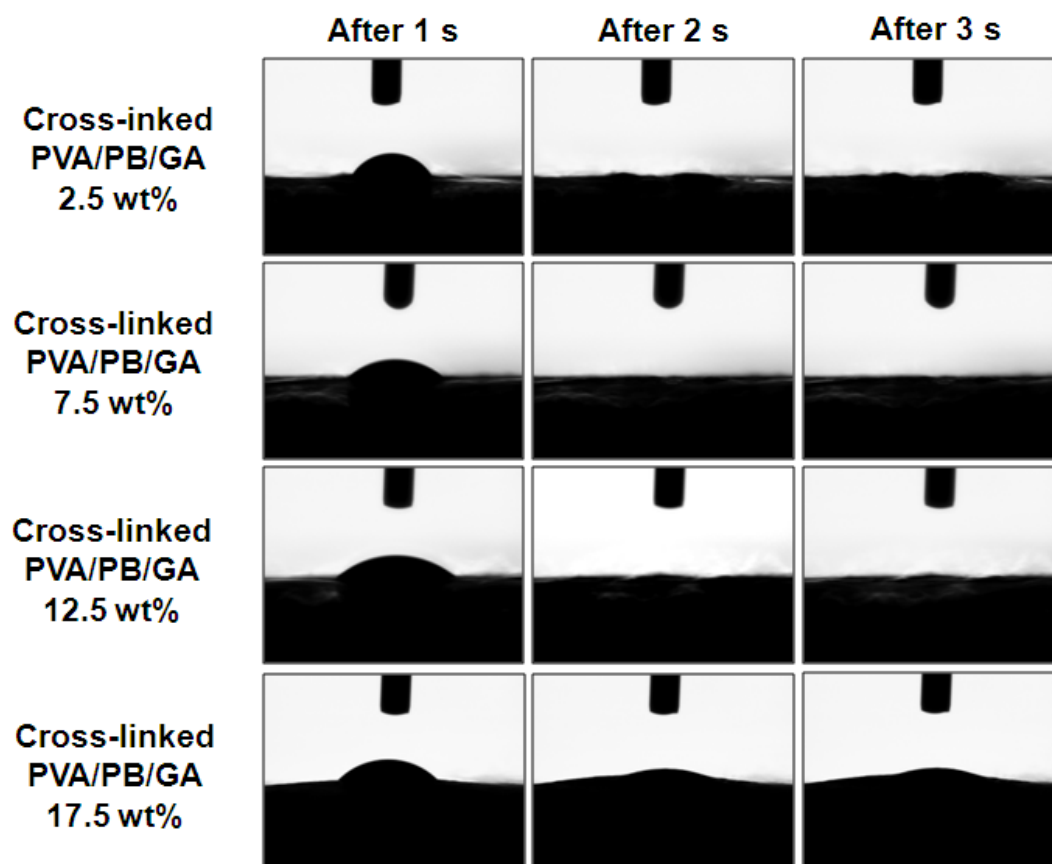

**Figure S5.** Pictures showing the water contact angles of *c*-PBNPs/PVA composite nanofibers with different concentrations of GA at different times.

**Table S1. Fe dissolution test with Cs adsorbents**

| S.No | Weight of PB of <i>c</i> -PBNPs/PVA composite nanofibers (mg) by ICP-MS | Solution amounts (mL) | Temperature (°C) | Concentration of Fe in solution (ppb) | Conversion concentration of Fe (ppb) |
|------|-------------------------------------------------------------------------|-----------------------|------------------|---------------------------------------|--------------------------------------|
| 1    | 1.0059                                                                  | 50                    | 25               | 15.19                                 | 1.519                                |
| 2    | 1.0033                                                                  | 50                    | 25               | 17.21                                 | 1.721                                |
| 3    | 1.0028                                                                  | 50                    | 25               | 19.34                                 | 1.934                                |
